# Supplementary material for: PinMyMetal: A hybrid learning system to accurately model metal binding sites in macromolecules
Source: Research Square preprint supplement (doi:10.21203/rs.3.rs-3908734/v1), 2024-02-21
Supplement: Supplementary file 1 [file bf1eb137d6ddf7ddf93d15fb.docx]

PinMyMetal: A hybrid learning system to accurately model metal binding sites in macromolecules

Supplementary information

**Supplementary Table 1.** A benchmark dataset of CMM-validated non-redundant zinc binding sites for training PMM.

| No. of ligands | CC | HH | CH | All sites | No. of structure | cutoff criteria of CMM |
| --- | --- | --- | --- | --- | --- | --- |
| 2 | 163 | 3644 | 541 | 4348 | 3936 | Qc>0.355, Qv>0.25, Qe>0.5 |
| 3 | 665 | 2748 | 1015 | 4428 | 4041 | Qc>0.5, Qv>0.5, Qe>0.5 |
| 4 | 6536 | 27 | 5640 | 12203 | 7376 | Qc>0.5, Qv>0.5, Qe>0.5 |

**Supplementary Table 2.** For the benchmark dataset, the statistics of the candidate zinc sites and verified zinc sites predicted by PMM.

| No. of ligands | Candidate zinc sites | | | | | Verified zinc sites | | | | |
| --- | --- | --- | --- | --- | --- | --- | --- | --- | --- | --- |
| CC | HH | CH | All sites | Recall1 | CC | HH | CH | All sites | Recall2 |
| 2 | 147  (94)* | 3046  (2933) | 434  (430) | 3627  (3457) | 83.4 %  (79.5%) | 134 | 2885 | 417 | 3436 | 94.7% | |
| 3 | 636  (430) | 2350  (2336) | 841  (763) | 3827  (3529) | 86.4 %  (79.7%) | 591 | 2344 | 826 | 3761 | 98.3% |
| 4 | 5842  (5300) | 22  (20) | 5307  (5146) | 11171  (10466) | 91.5 %  (85.8%) | 5742 | 22 | 5268 | 11032 | 98.8% |

*The values in parentheses are obtained when the predicted ligand is exactly the same as the actual ligand, which is the statistical result when IouR=1; "Recall1" indicates the recall for PMM predicting candidate zinc sites on the CMM-validated dataset, and "Recall2" represents the recall for PMM predicting verified zinc sites on the dataset with previously identified candidate sites.

**Supplementary Table 3.** Zinc binding sites of unknown function predicted by PMM.

| No. of ligands | Predicted sites | | | | Other metal sites | | | | Cryo-EM sites | | | |
| --- | --- | --- | --- | --- | --- | --- | --- | --- | --- | --- | --- | --- |
| CC | HH | CH | All | CC | HH | CH | All | CC | HH | CH | All |
| 2 | 1125 | 554 | 374 | 2035 | 176 | 252 | 17 | 445 | 282 | 39 | 104 | 425 |
| 3 | 186 | 463 | 364 | 1013 | 4 | 159 | 141 | 304 | 59 | 4 | 35 | 98 |
| 4 | 245 | 64 | 177 | 486 | 4 | 38 | 0 | 42 | 22 | 0 | 28 | 50 |

Predicted sites: All zinc sites predicted by PMM, including other metal sites and EM sites; Other metal sites: predicted zinc sites that contain another experimentally determined transition metal other than zinc; Cryo-EM sites: Predicted zinc sites are from structures determined by cryo-electron microscopy.


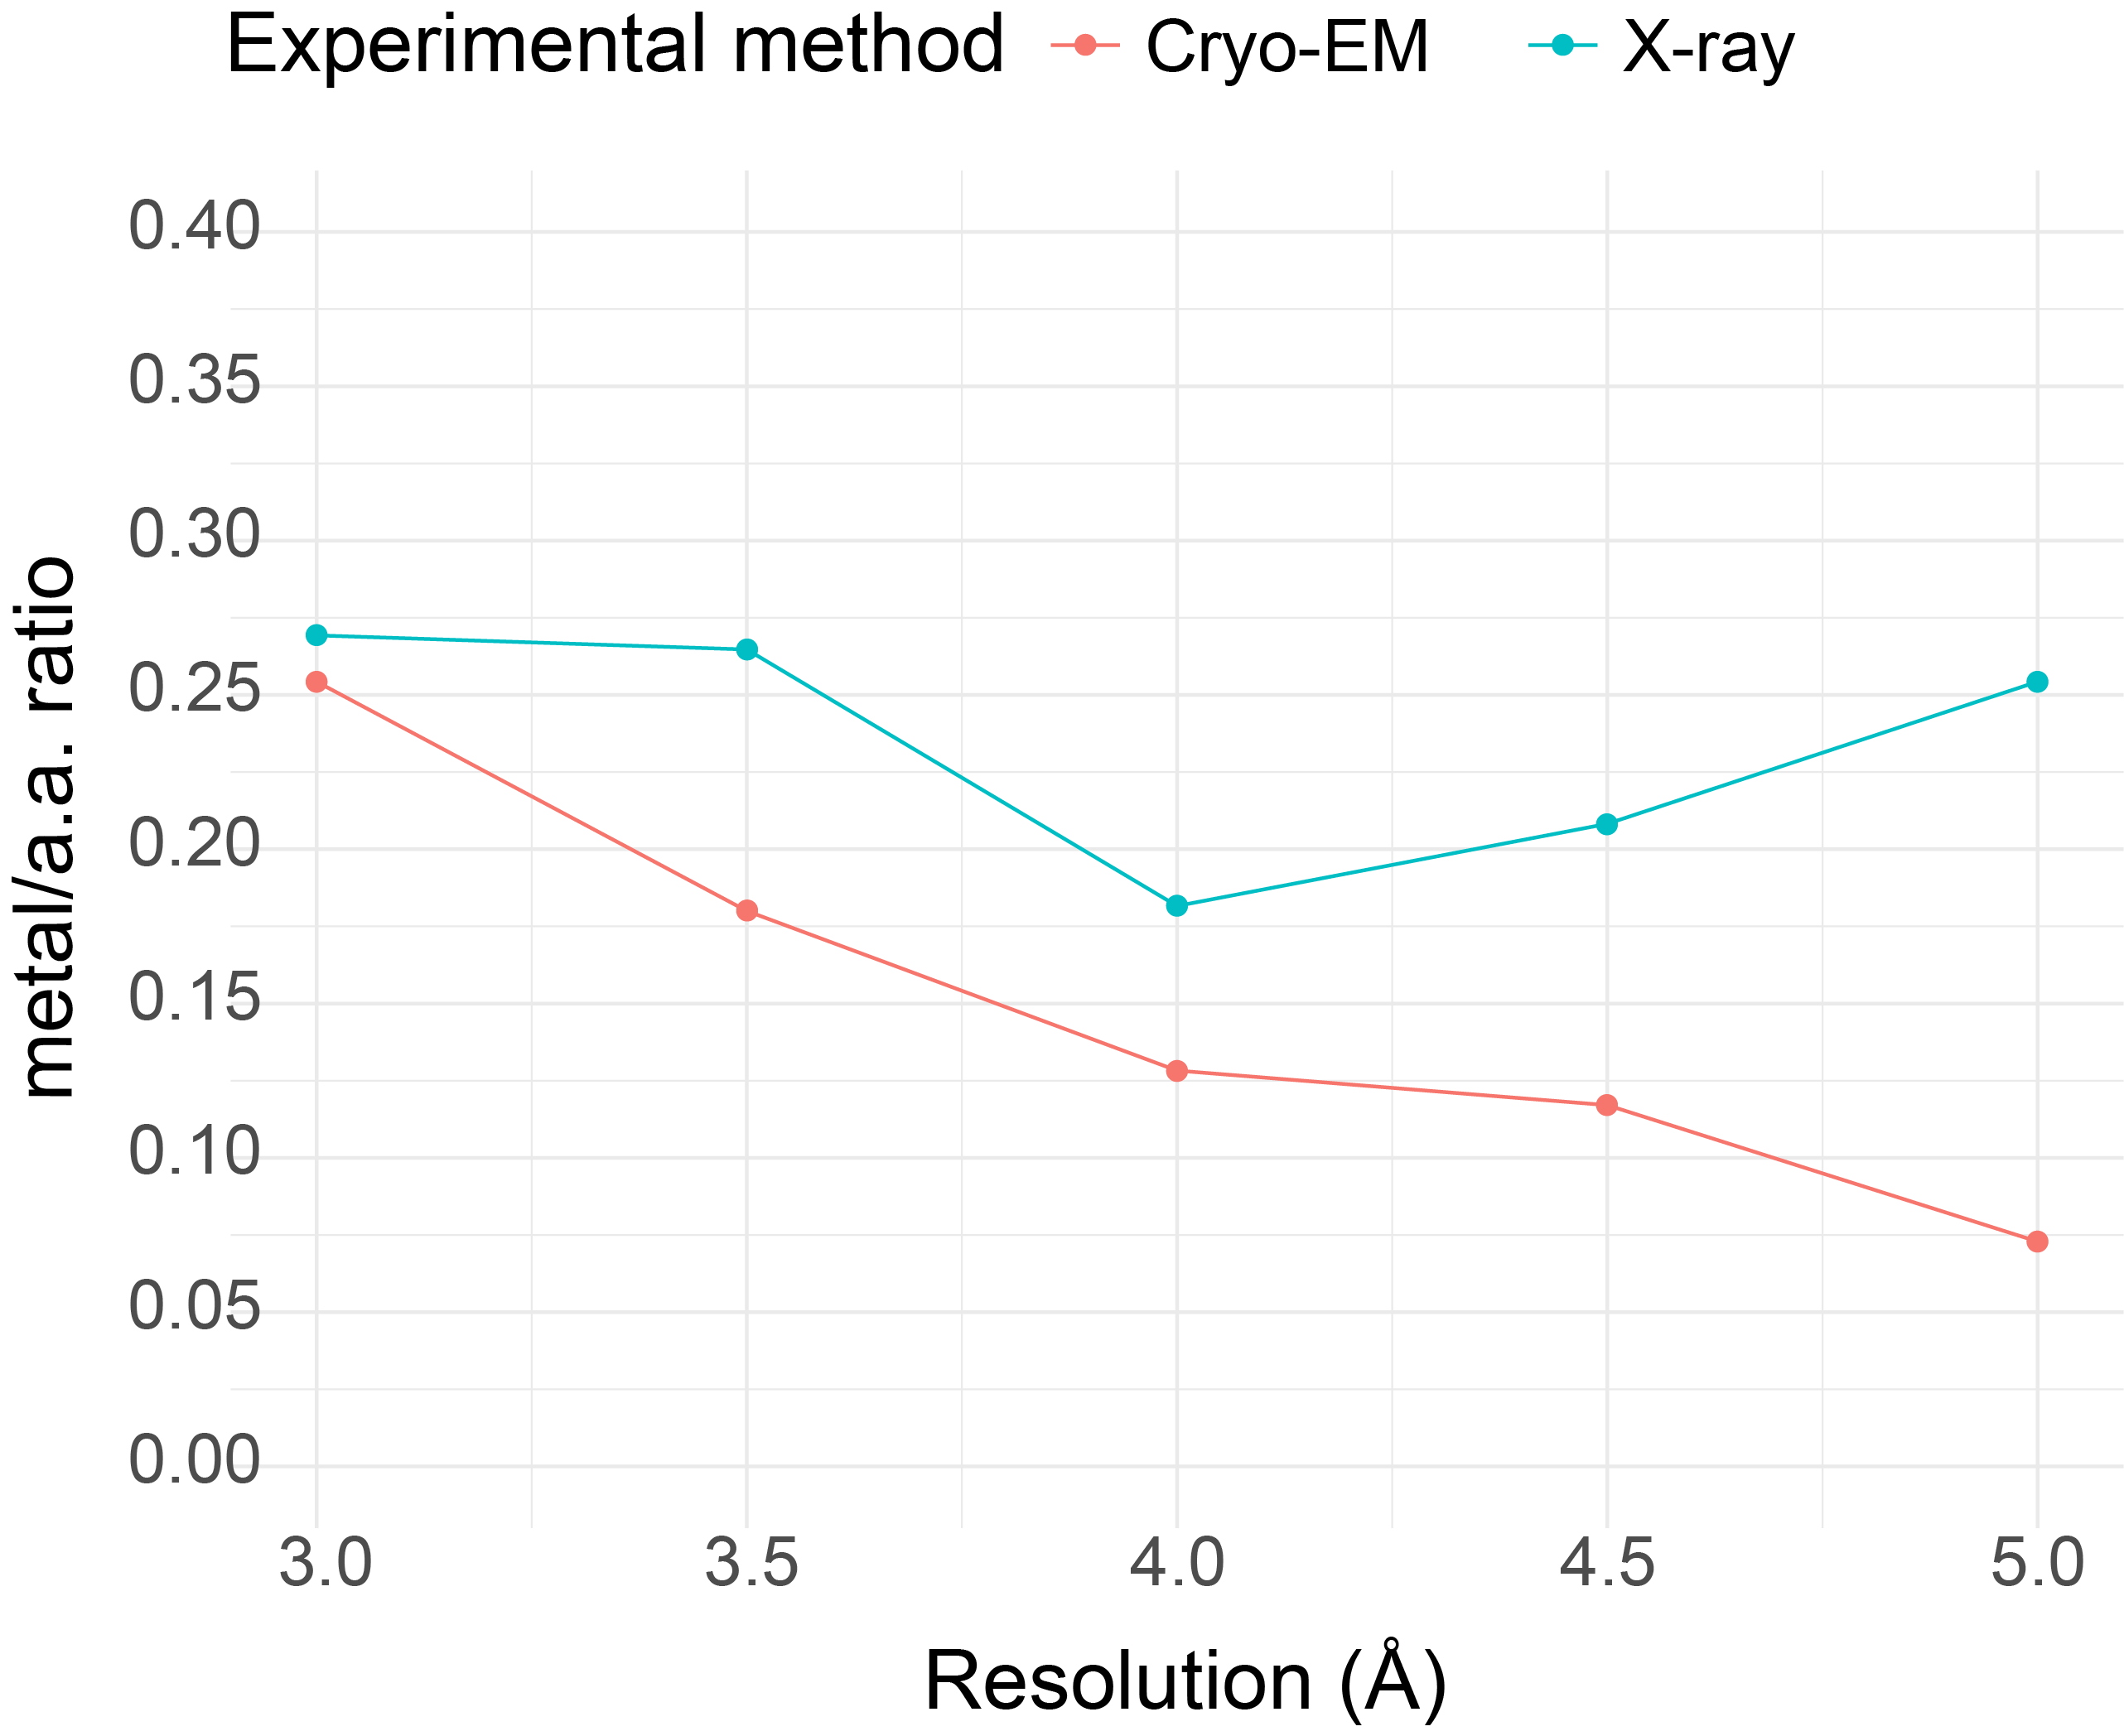


**Supplementary Figure 1. Average number of transition metal ions per 100 amino acids in X-ray and Cryo-EM structures of different resolutions.**

**Supplementary Table 4.** Statistics of prediction results of PMM, ZincBindDB, GRE4Zn, TEMSP, and CHED on the same dataset.

| Method | No. of TP | | No. of FN | No. of FP | Precision | Recall | Average Zinc-deviation (Å) |
| --- | --- | --- | --- | --- | --- | --- | --- |
| PMM | 129 | 7 | | 3 | 0.977 | 0.949 | 0.248 |
| GRE4Zn | 101 | 35 | | 5 | 0.953 | 0.743 | 0.267 |
| TEMSP | 117 | 19 | | 5 | 0.959 | 0.860 | 0.380 |
| ZincBindDB | 115 | 21 | | 273 | 0.296 | 0.846 | - |
| CHED | 112 | 24 | | 11 | 0.911 | 0.824 | - |

TP (true positive): IoUR≥0.5; FP (false positive): IoUR<0.5; FN (false negative): Sites that were not labeled as zinc binding based on the original PDB data.

**Supplementary Table 5.** Comparison of PMM and Metal3D predictor.

| Test set data in the Metal3D article (59 PDB entries） | | | | | | | |
| --- | --- | --- | --- | --- | --- | --- | --- |
| Method | Exp_site | Deviation (Å) | TP | FP | FN | Precision | Recall |
| Metal3D | 189 | 0.52 | 78 | 47 | 111 | 0.624 | 0.412 |
| PMM | 205 | 0.166 | 117 | 2 | 88 | 0.983 | 0.571 |
| Prediction results of PMM on the identification of other transition metals dataset in Metal3D | | | | | | | |
| Metal | Exp_site | Deviation (Å) | TP | FP | FN | Precision | Recall |
| Mn | 38 | 0.818 | 16 | 3 | 22 | 0.889 | 0.421 |
| Fe2 | 33 | 0.468 | 27 | 3 | 6 | 0.900 | 0.818 |
| Fe3 | 33 | 0.746 | 23 | 4 | 10 | 0.852 | 0.697 |
| Co | 31 | 0.826 | 15 | 2 | 16 | 0.882 | 0.484 |
| Ni | 30 | 0.355 | 26 | 4 | 4 | 0.867 | 0.867 |
| Cu | 66 | 0.616 | 64 | 6 | 2 | 0.914 | 0.970 |
| Zn | 61 | 0.257 | 50 | 4 | 11 | 0.926 | 0.820 |
| Prediction results of PMM on CMM-validated dataset with Resolution < 2 Å | | | | | | | |
| Metal | Exp_site | Deviation (Å) | TP | FP | FN | Precision | Recall |
| Mn | 2270 | 0.717 | 488 | 26 | 1782 | 0.949 | 0.215 |
| Fe2 | 419 | 0.340 | 283 | 2 | 136 | 0.993 | 0.675 |
| Fe3 | 874 | 0.457 | 475 | 12 | 399 | 0.975 | 0.543 |
| Co | 633 | 0.512 | 234 | 21 | 399 | 0.918 | 0.370 |
| Ni | 854 | 1.245 | 431 | 25 | 423 | 0.945 | 0.505 |
| Cu | 1462 | 0.510 | 1241 | 22 | 221 | 0.983 | 0.849 |
| Zn | 10148 | 0.333 | 8228 | 443 | 1920 | 0.949 | 0.811 |

Exp_site: Experimental metal site; Deviation (Å): Average deviation between predicted positions and experimental locations.


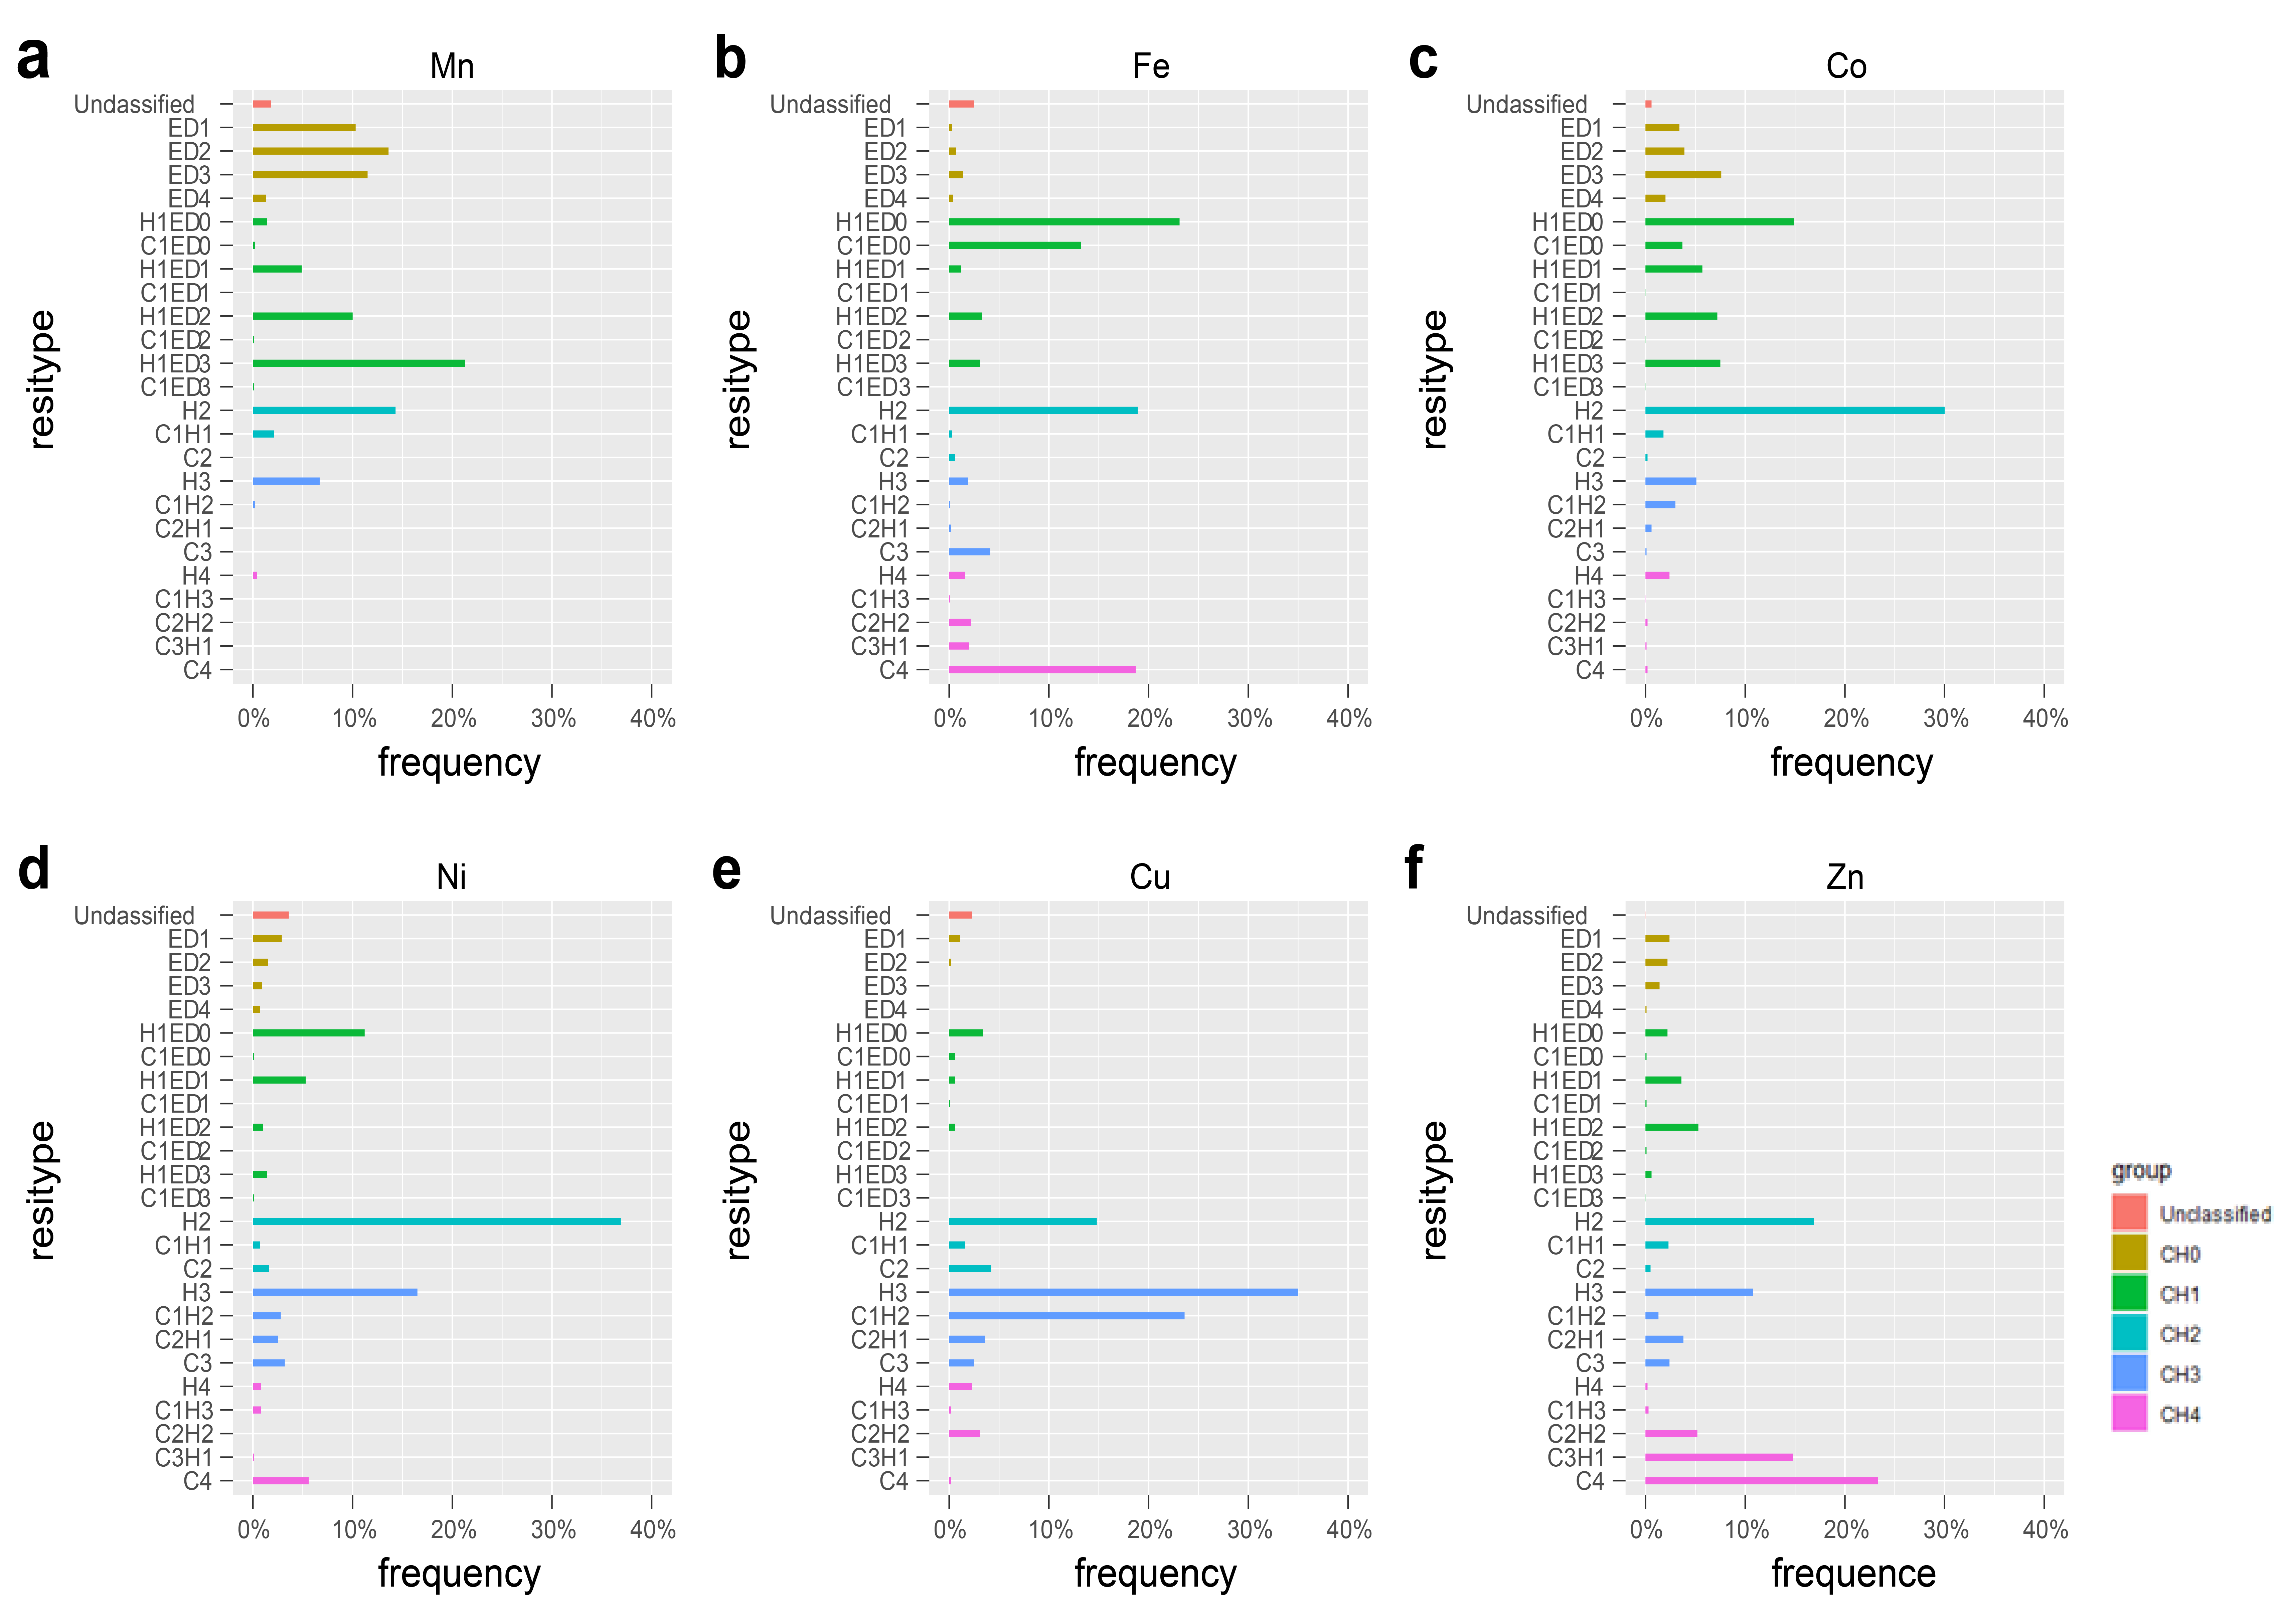


**Supplementary Figure 2. Distribution of transition metal coordination motifs.** CH0, CH1, CH2, CH3, and CH4 represent combinations of metal coordination sites where ligands contain 0, 1, 2, 3, 4 C and/or H ligands; "Unclassified" denotes other uncategorized ligand combinations.

**
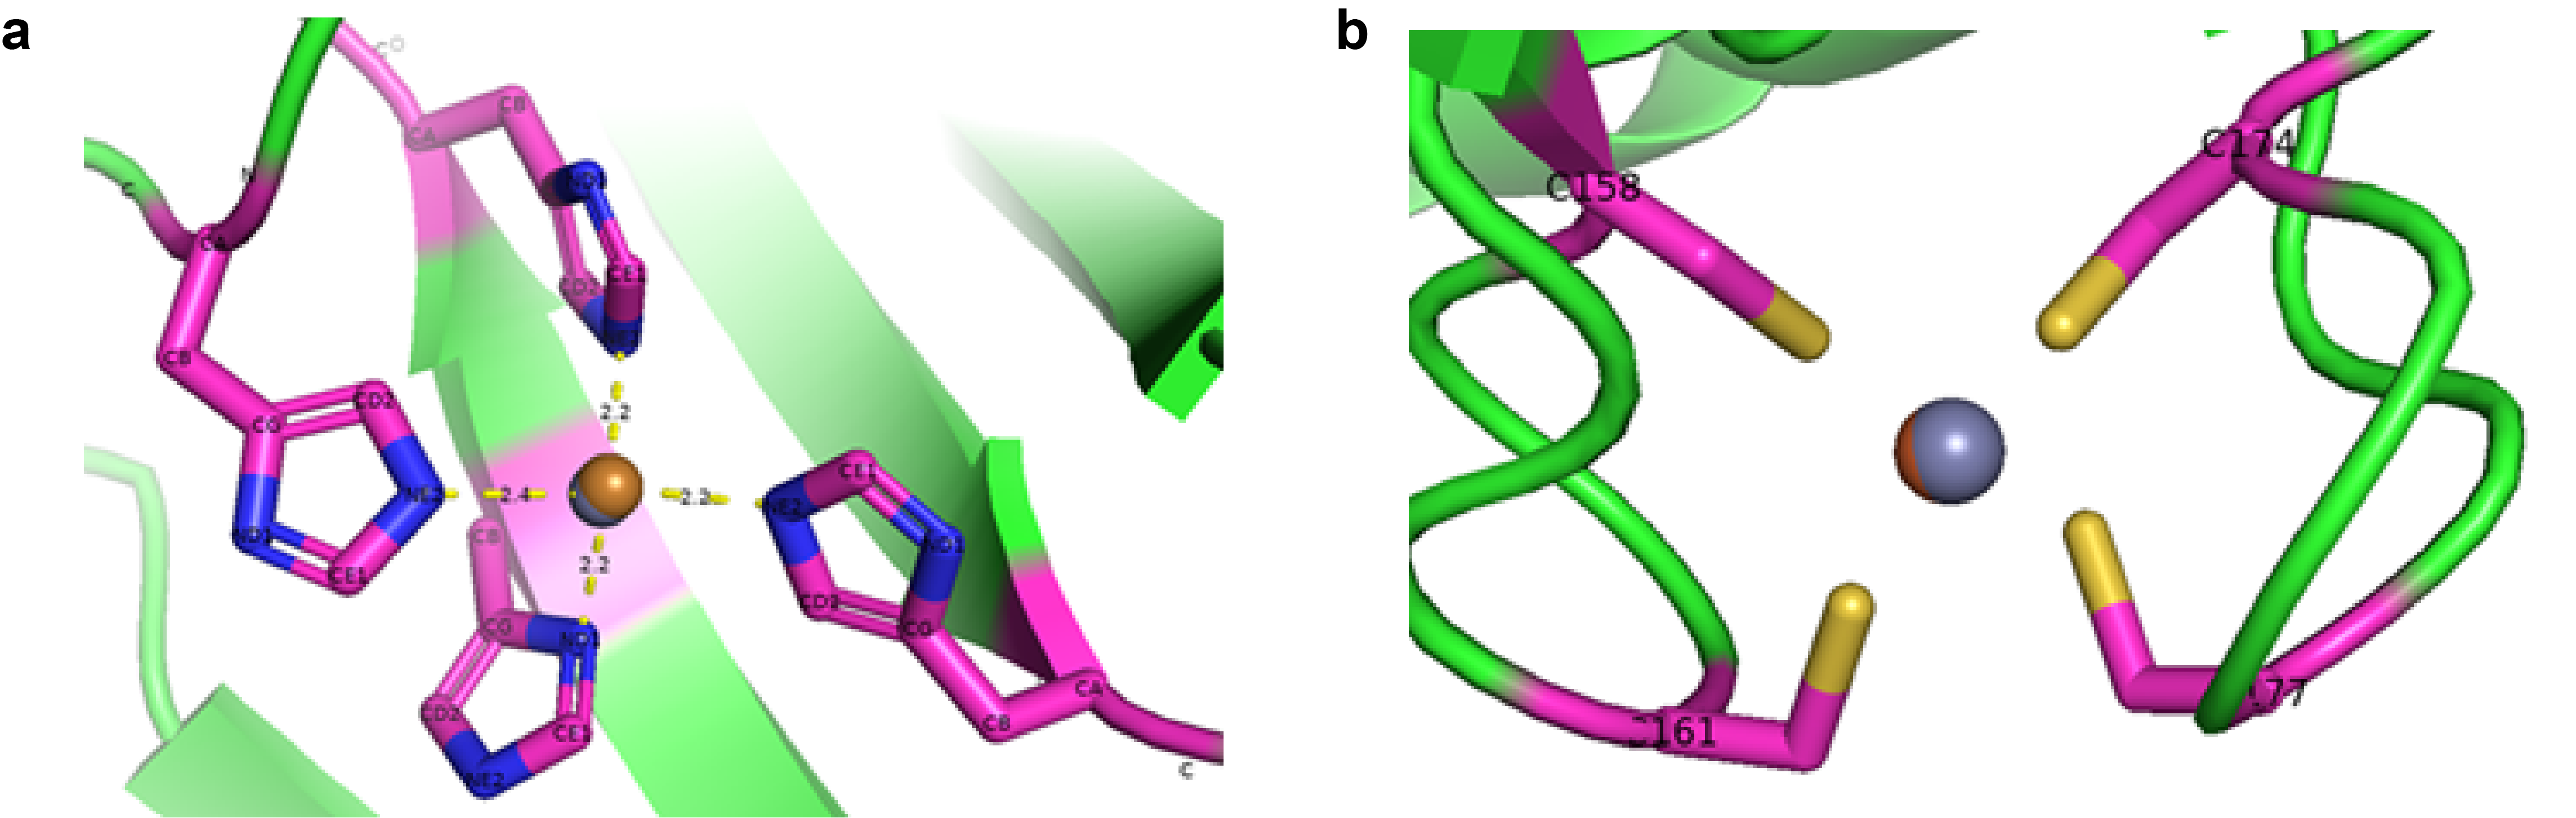
**

**Supplementary Figure 3. Incorrectly assigned zinc ions. a,** 3mnd, Cu assigned as Zn. **b,** 1jyb, Fe assigned as Zn.


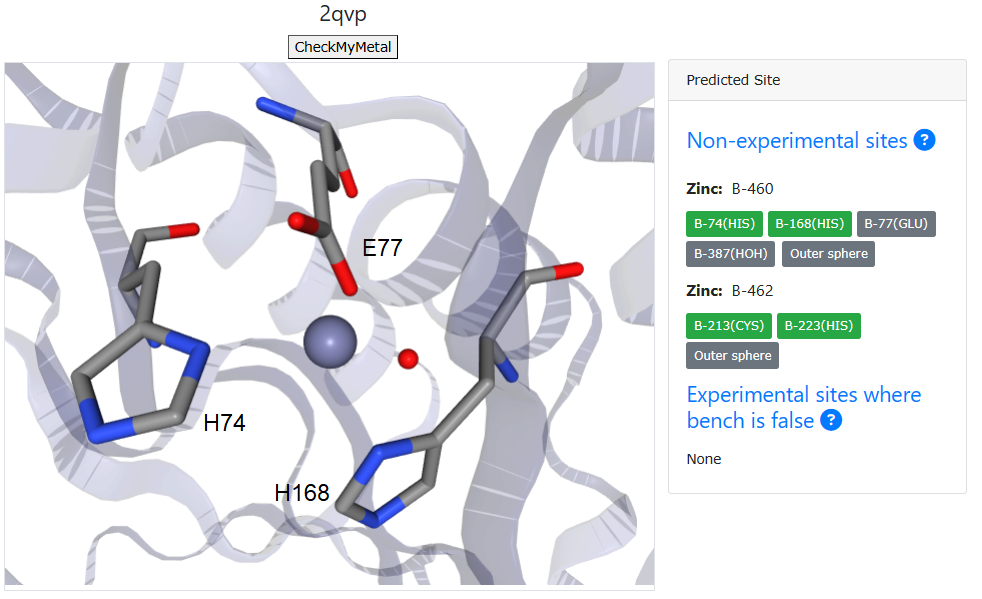


**Supplementary Figure 4. PMM recognizes ligands other than CH at zinc binding sites.** A screenshot of the predicted results for the B chain of 2qvp on the PMM web server. Non-experimental sites: Zinc binding sites with unknown functions predicted by PMM. Ligand coloring at zinc binding sites: Green represents C or H ligands, while gray represents ligands other than C and H.


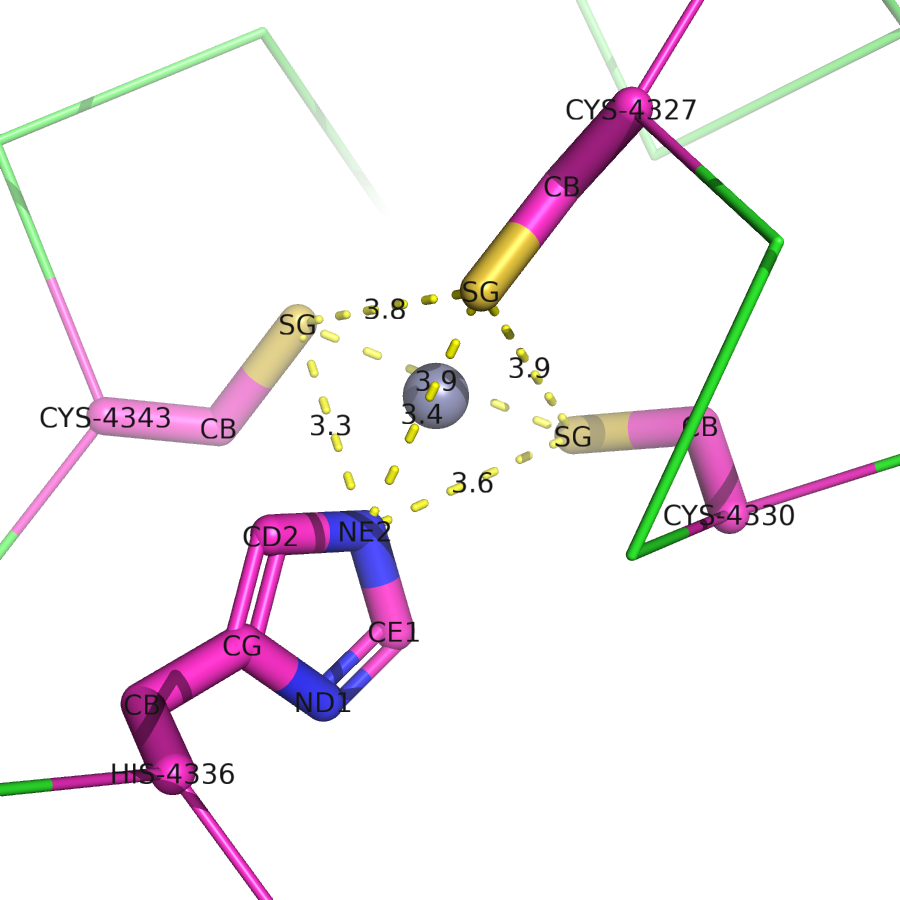


**Supplementary Figure 5. Geometric characteristics of zinc binding sites.** Using a zinc binding site from the structure of 6w4h as an example illustrates the structural features of the zinc binding site.


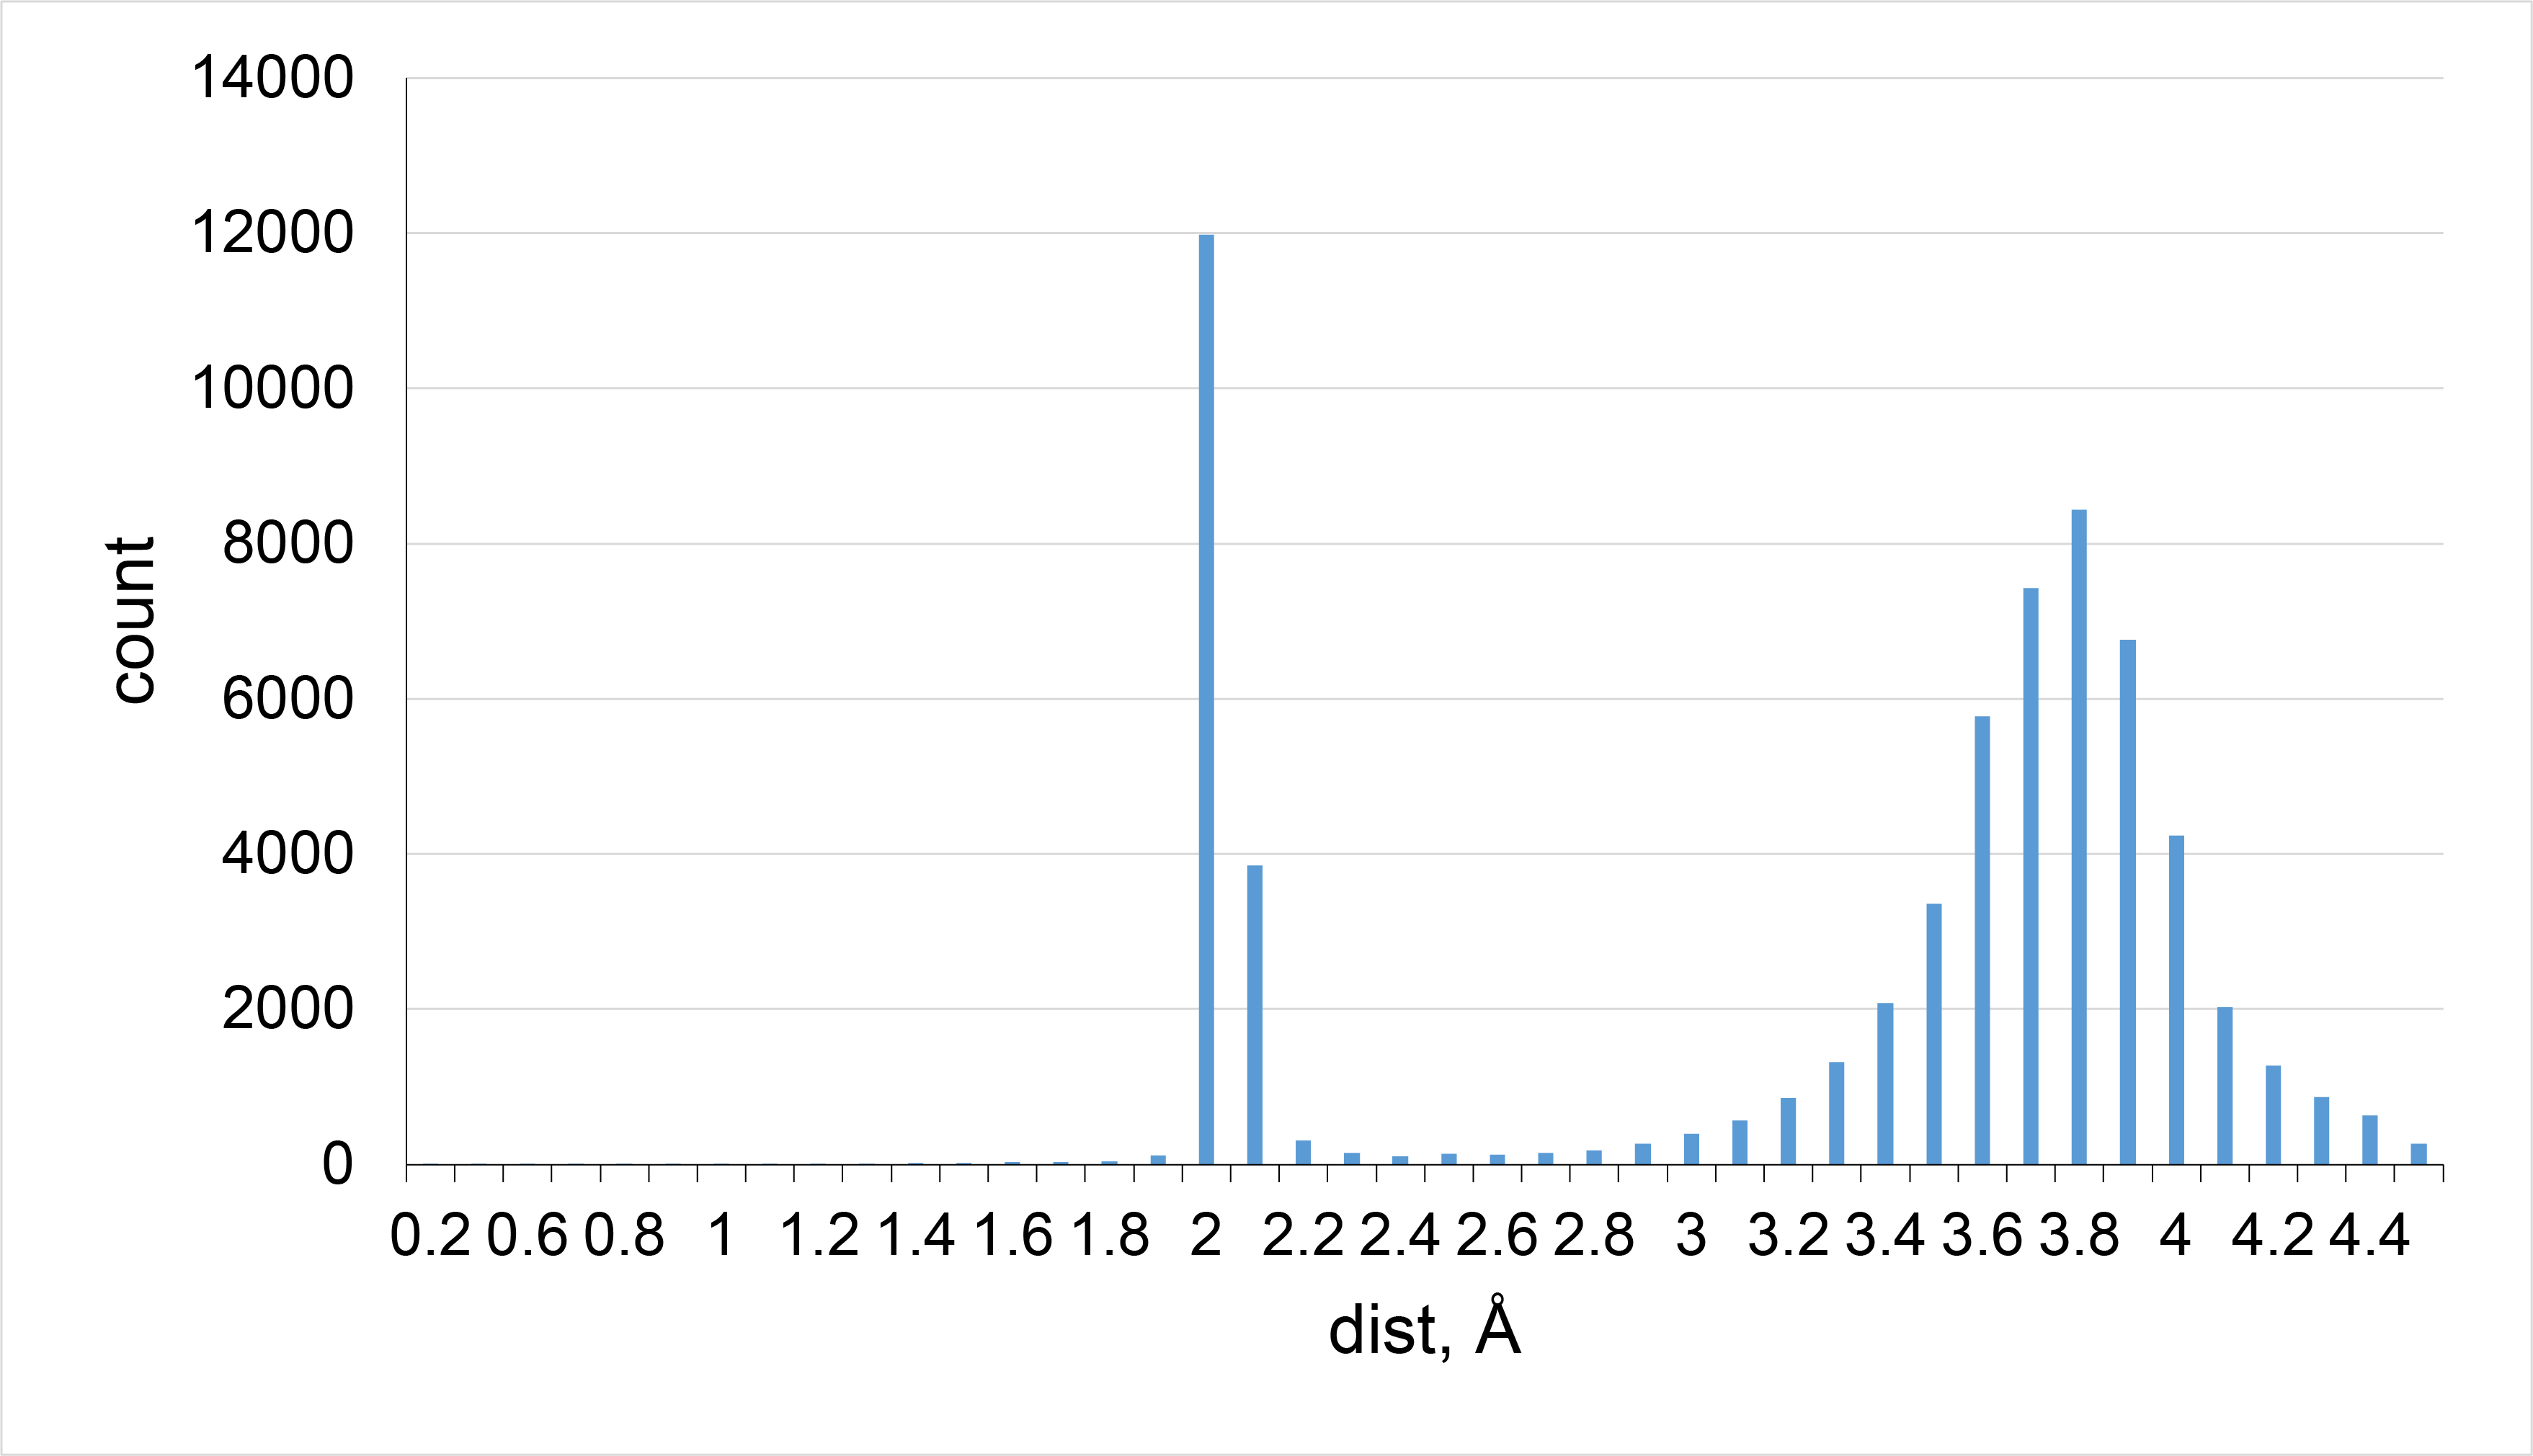


**Supplementary Figure 6. Distance distribution between SG atoms in protein structure.**


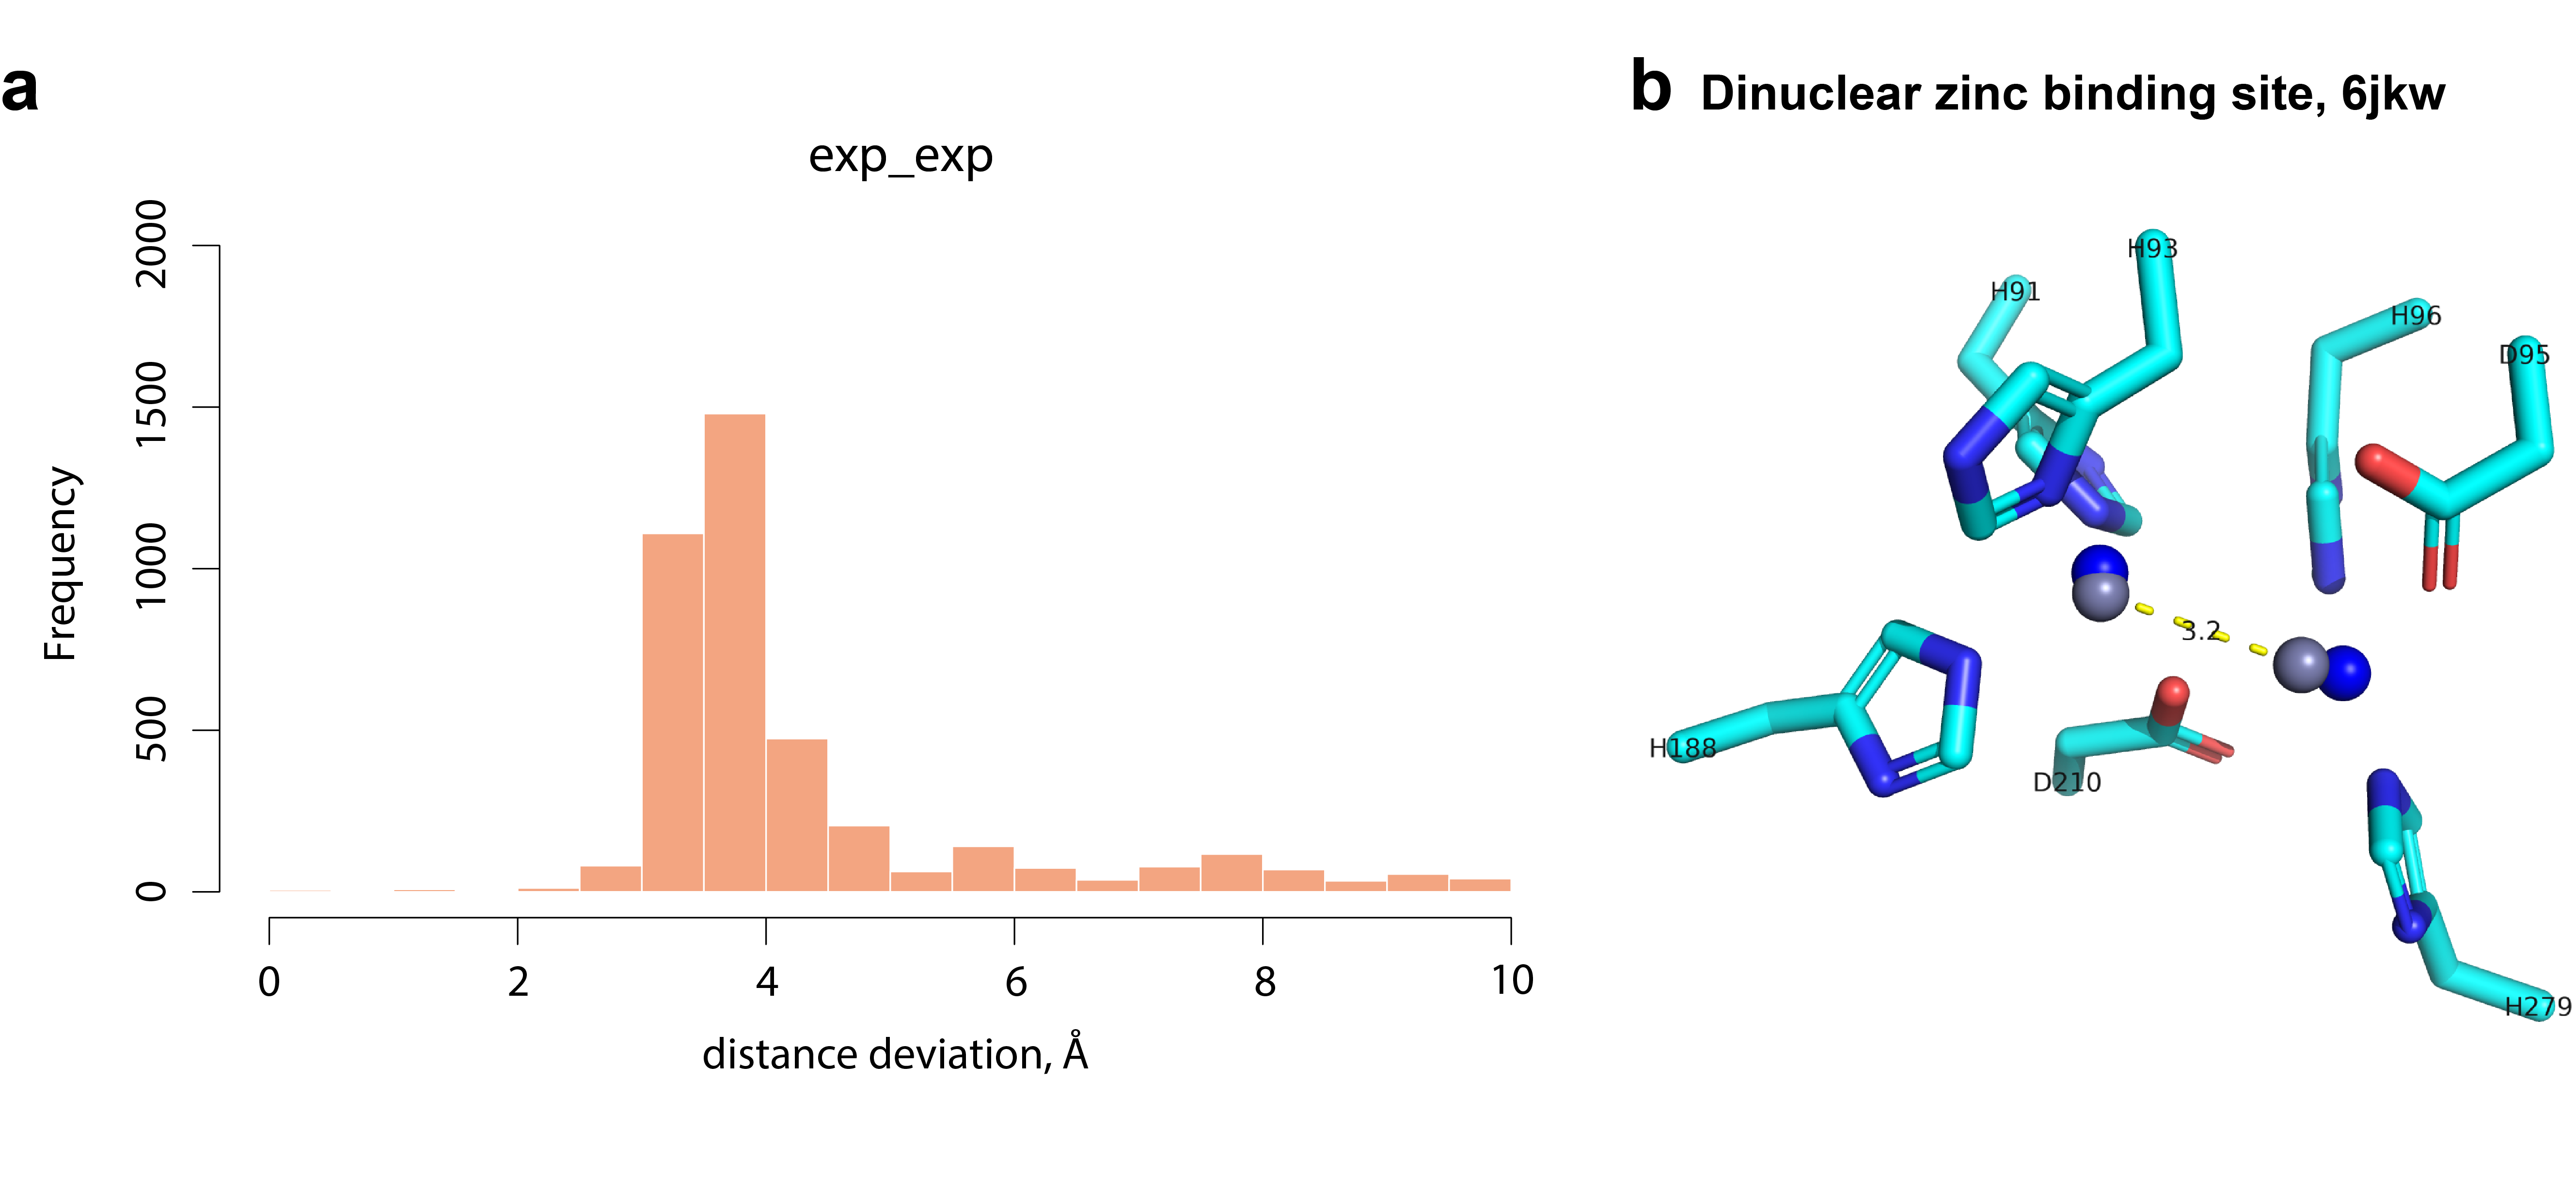
**Supplementary Figure 7. Distance distribution between experimental zinc binding sites. a,** experimentally determined zinc ion distance distribution. **b,** PMM predicts the dinuclear zinc binding sites. The blue spheres represent predicted zinc sites, while the gray spheres depict zinc sites already present in the structure.

**Supplementary Table 6.** Most common coordination spheres in enzymes by class. The count represents approximately 80% of found spheres for each enzyme class. Note that these show only the protein ligands and may contain various external ligands, especially at low coordination numbers.

| Function | Common coordination spheres (share-%)a |
| --- | --- |
| Structural | C4(28.17%), C3H1(18.50%), C2H2(8.54%), H3E/D1(1.66%), |
| Oxidoreductase 1 | C4(20.31%), H3D1(19.19%), C3H1(11.41%), C2H1(8.88%), H2E/D1(6.76%), C1H2(3.94%), H3(3.84%), H1E/D2(4.46%), H1(2.53%), C2H1E/D1(2.40%), C1H1E/D1(3.05%), H2(1.63%), H1D1(1.31%), C2H2(1.19%), E2(1.12%) |
| Transferase2 | C4(43.77%), C3H1(32.22%), C2H2(4.96%), C3(4.06%), H1E/D2(1.92%), C1H1E/D1(1.85%), C2H1(1.40%), C2H1E/D1(1.15%) |
| Hydrolase3 | H2D1(10.60%), H2E1(10.58%),H1E/D2(10.28%), H2D2(9.93%), C4(8.76%), H3(8.12%), C3H1(5.82%), H3E/D1(5.22%), C2H2(3.56%), H2(3.01%), C2H1(2.85%), H1(2.59%), C1H1E/D1(2.49%), E1D2(2.09%), C3(1.68%), H1E/D1(3.07%), C1H2(1.35%), E/D1(2.63%), E1D1(1.34%) |
| Lyase4 | H3(67.49%), H2D1(5.07%), C2H1D1(4.47%), C2H1(3.79%), H3E/D1(3.53%), H2(2.88%), C4(1.69%), C3(1.55%), H2E/D1(1.51%) |
| Isomerase5 | H2E/D2(20.76%), H1E/D3(17.49%), D3(11.48%), C3H1(7.65%), H1E/D2(6.56%), H2E/D1(7.10%), H3E/D1(6.01%), H1(4.92%), H1E/D1(4.37%), C4(3.83%), H3(2.19%), E2D2(1.64%), E1D1(1.64%) |
| Ligase6 | C3H1(38.88%), C4(37.56%), C2H2(4.92%), H2E/D1(3.81%), C1H2(3.74%), C2E/D1(1.52%), C1H2E/D1(1.46%), C3(1.32%), H2(1.32%), H1E/D1(0.76%) |


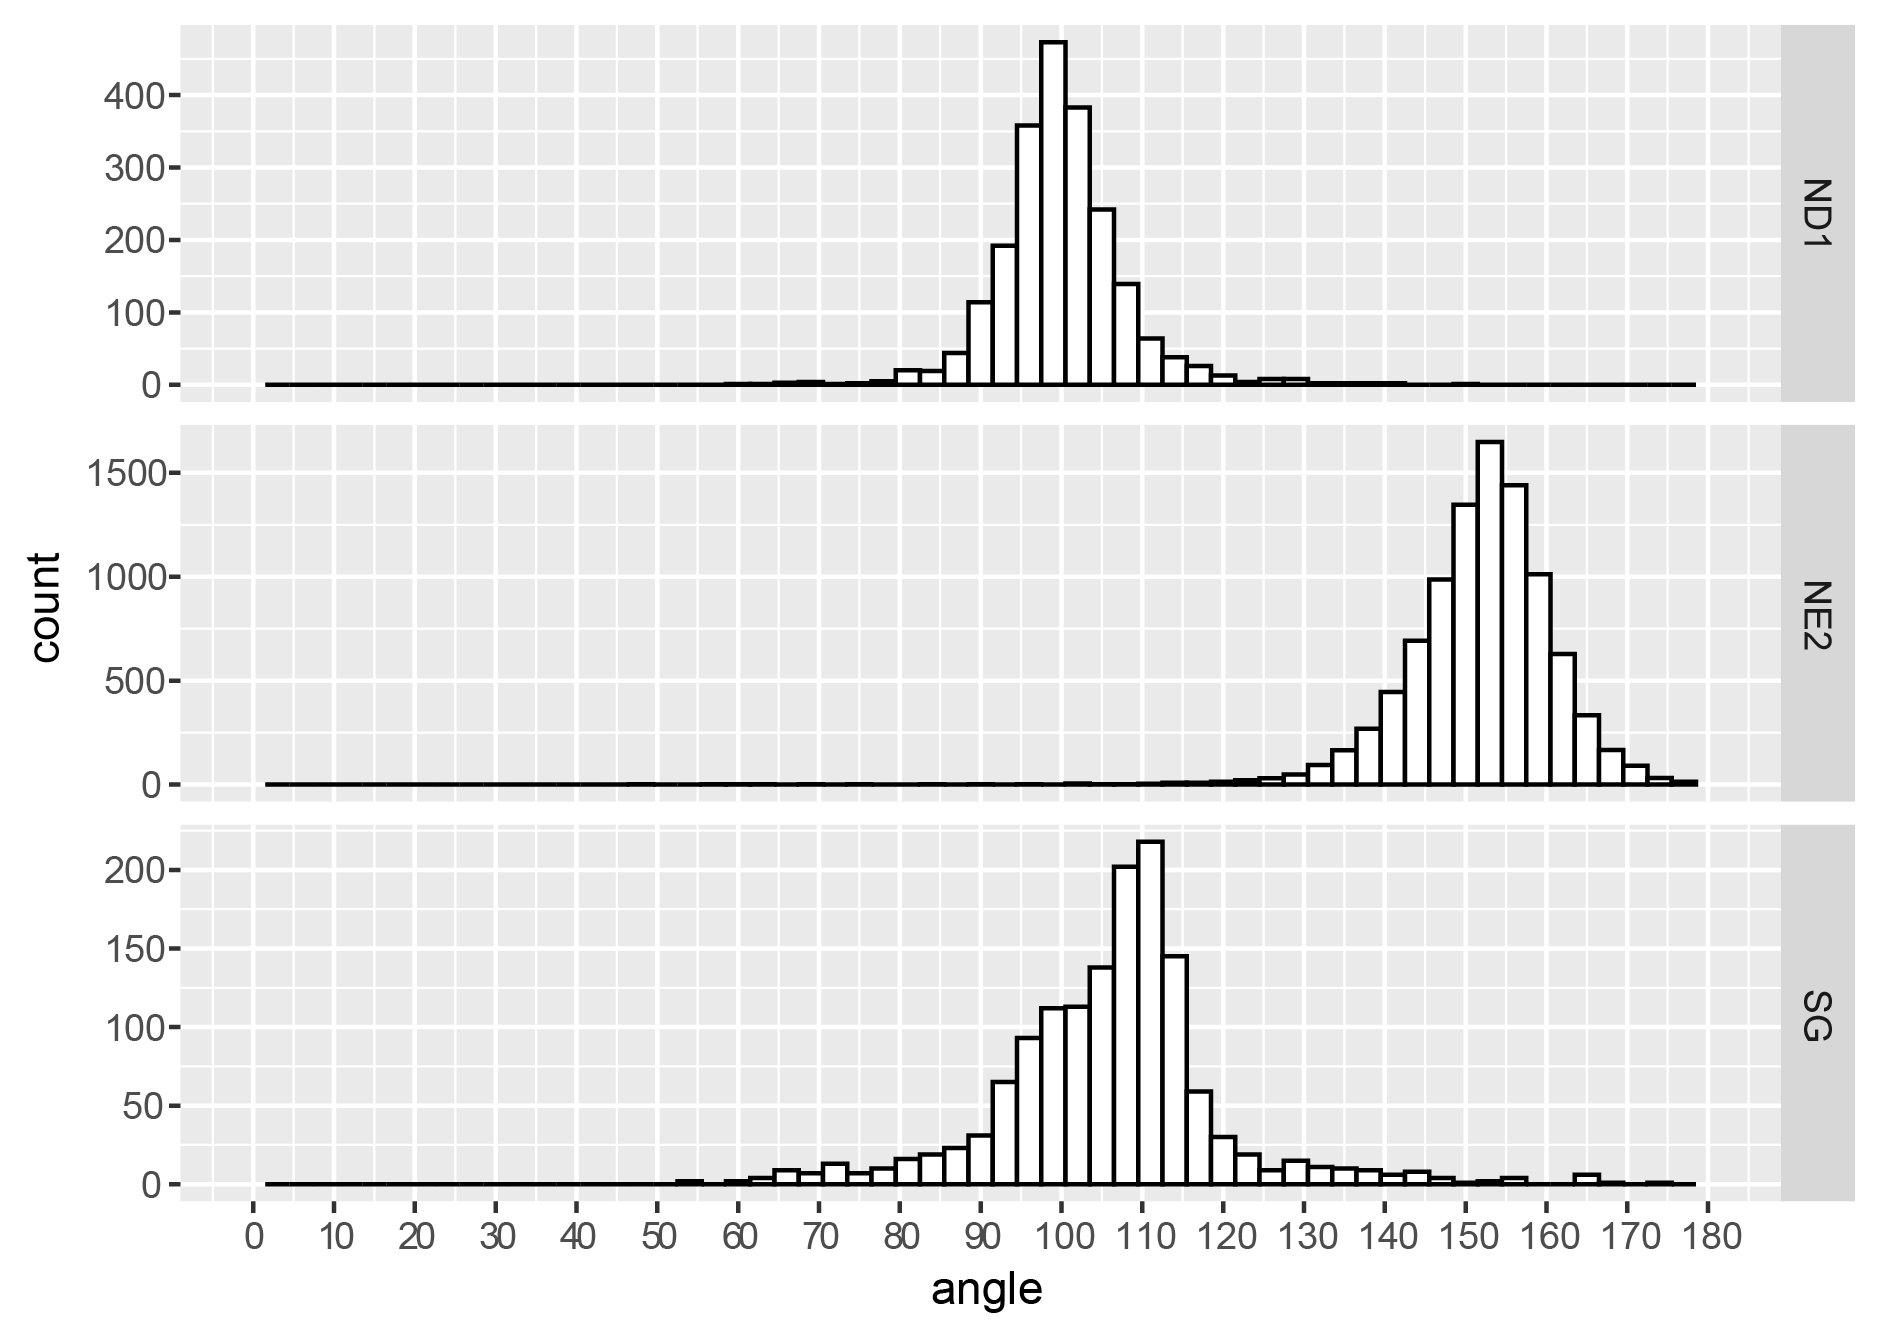


**Supplementary Figure 8. Distribution of Zn_atom_Cβ angle.** The distribution of angles between the zinc ion and atoms (ND1, NE2, or SG) as well as the Cβ atom of amino acids in the zinc binding site.

**
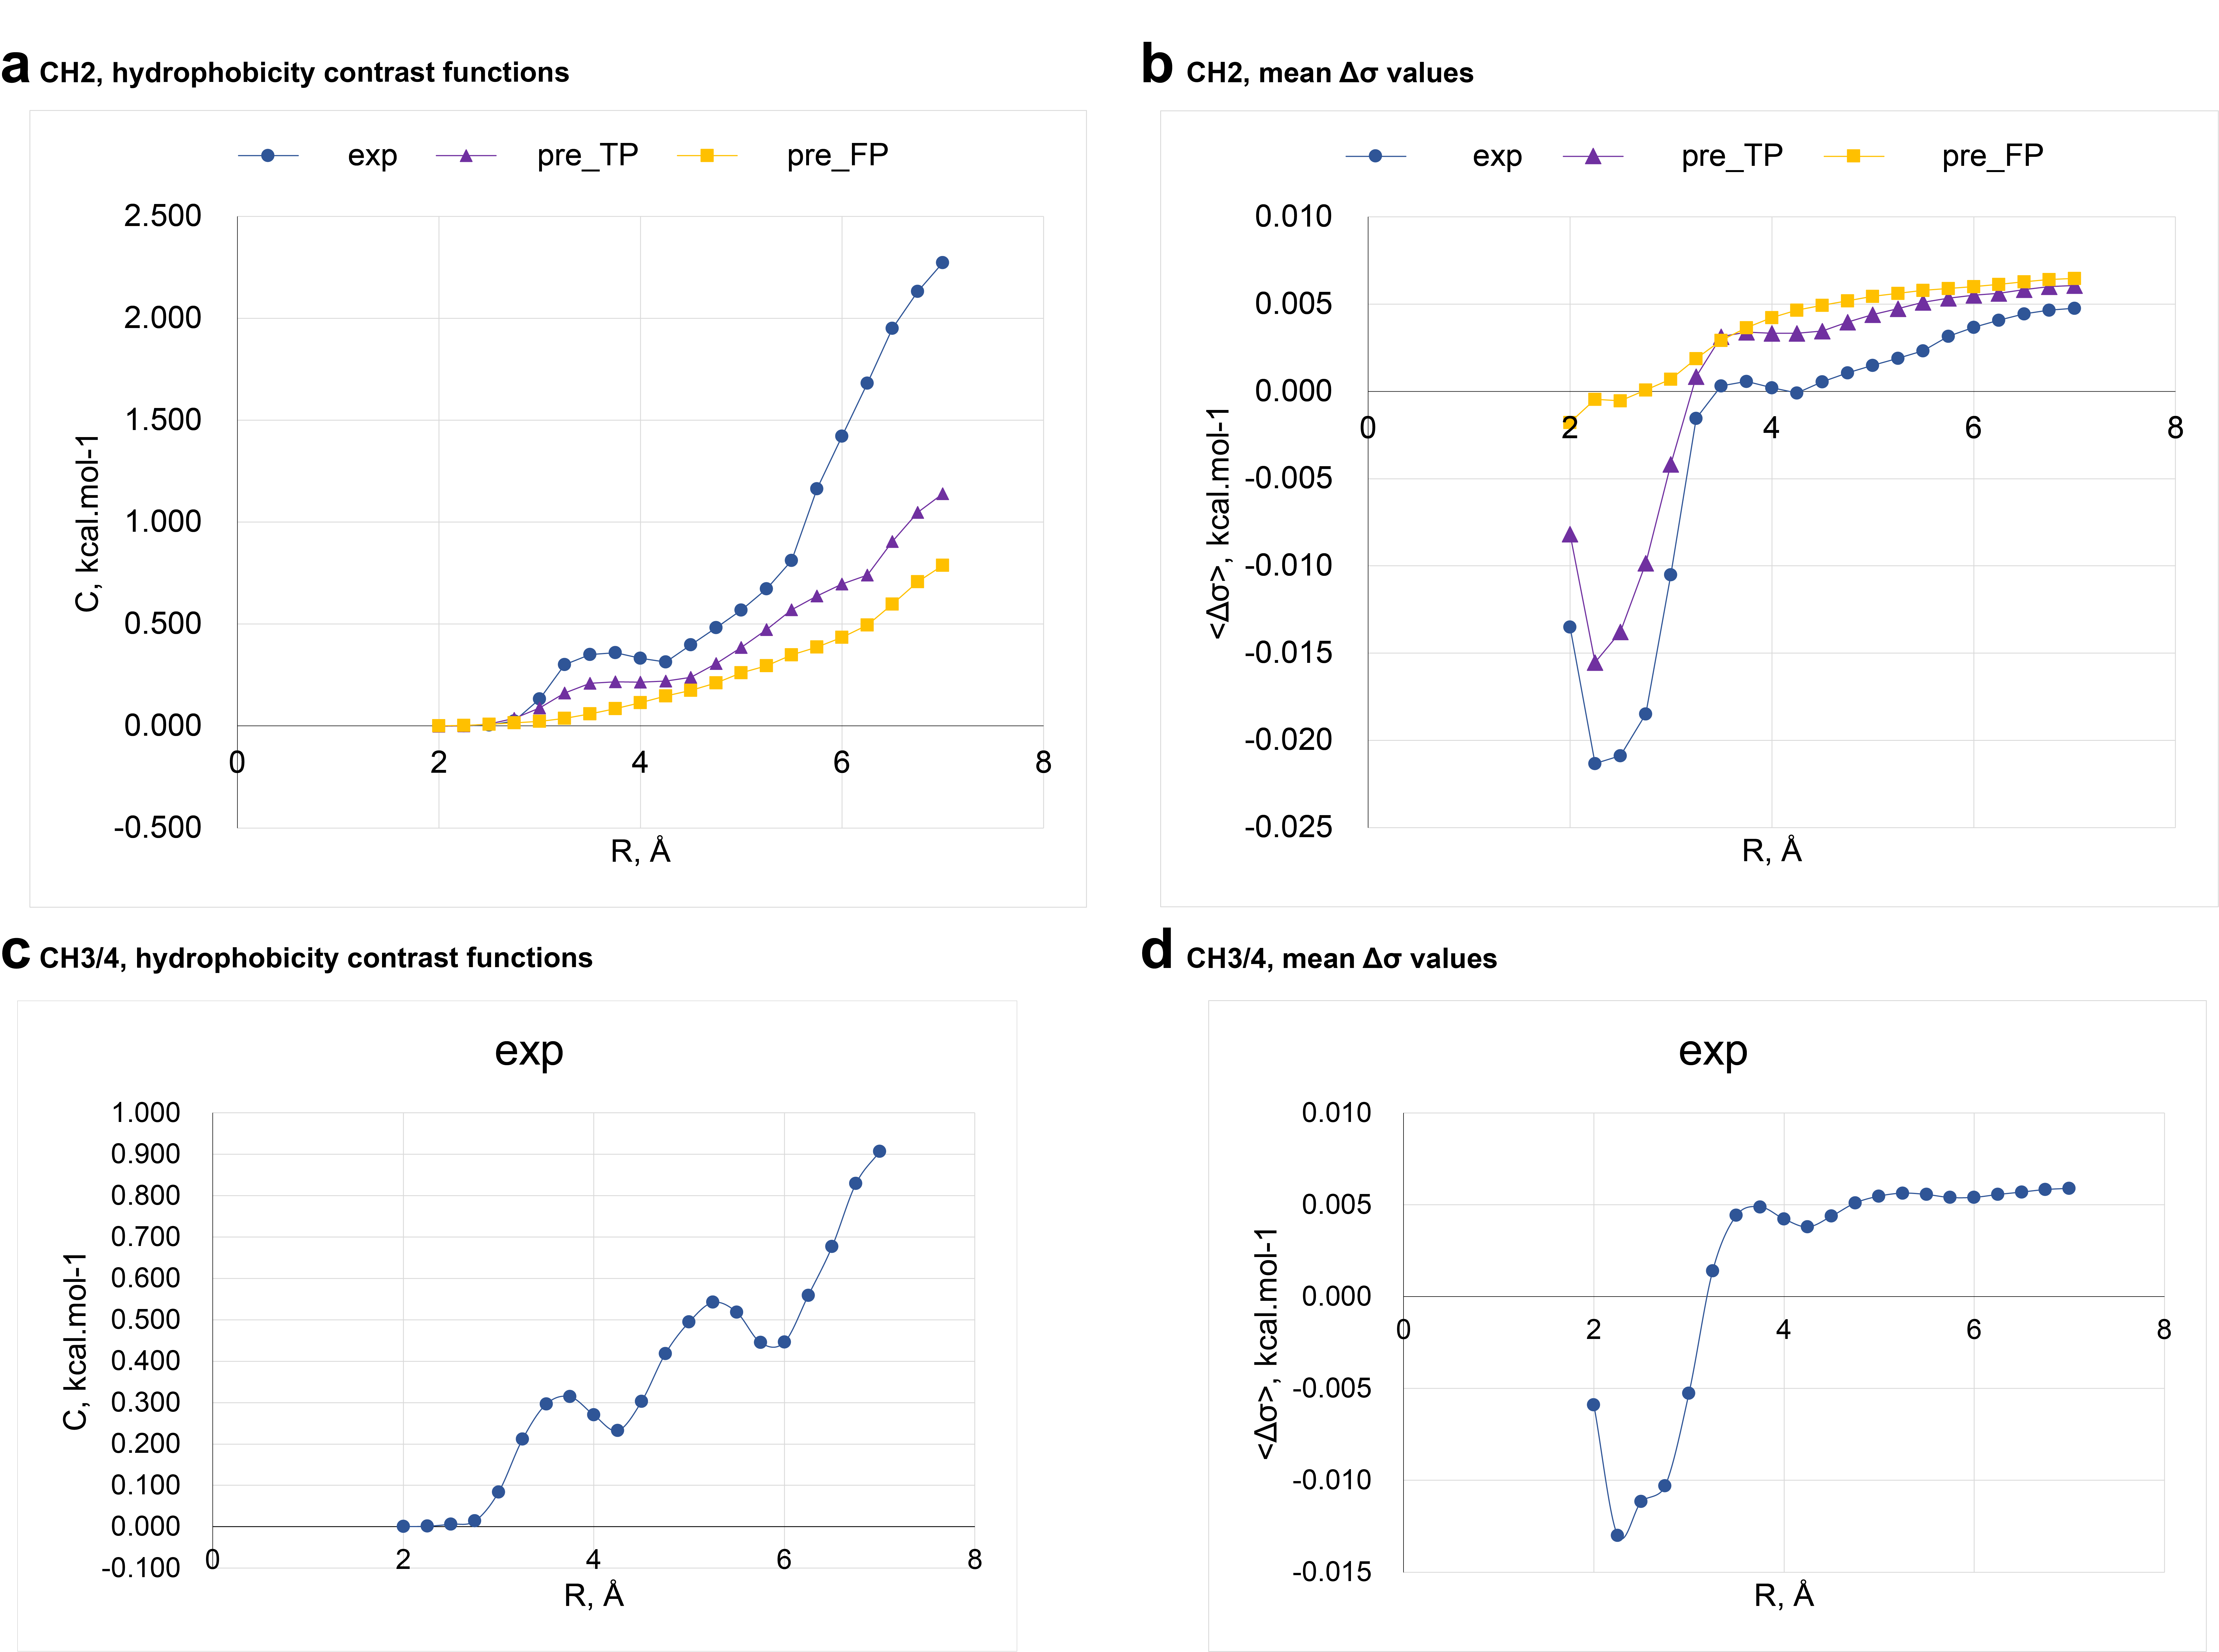
**

**Supplementary Figure 9. Hydrophobicity contrast functions (a, c) and mean Δσ values (b, d) around zinc binding sites in proteins (within radius R=7Å).** exp: experimentally identified zinc binding sites; pre_TP: ensemble model predicted positive zinc binding sites ; pre_FP: ensemble model predicted negative zinc binding sites. **a,** CH2, hydrophobicity contrast functions. **b,** CH2, mean Δσ values. **c,** CH3/4，hydrophobicity contrast functions. **d,** CH3/4, mean Δσ values.

**Supplementary Table 7.** Feature parameters for hybrid learning networks.

| Parameter | Annotation | Number |
| --- | --- | --- |
| AA_type | - The type of amino acid coordinated with zinc (CYS, HIS). | 1 |
| Atom_type | - An atom in a ligand amino acid that interacts with zinc   (SG, NE2, ND1, CD2, CE1). | 2 |
| Atom_dist | - The Euclidean distance between the atom of the ligand amino acid interacting with zinc. | 3 |
| Cα_dist | - The distance between the Cα of the ligand amino acids. | 4 |
| Cβ_dist | The distance between the Cβ of the ligand amino acids. | 5 |
| Angle1 | The angle formed by the Cα atom of residue A, the atom of residue A that interacts with zinc, the Cα atom of residue B, and the atom of residue B that interacts with zinc. | 6 |
| Angle2 | The angle formed by the Cβ atom of residue A, the Cα atom of residue A, and the Cα atom of residue B. | 7 |
| Angle3 | The angle formed by the Cβ atom of residue B, the Cα atom of residue B, and the Cα atom of residue A. | 8 |
| Angle4 | The torsional angle formed by the Cβ atom of residue A, the Cα atom of residue A, the Cα atom of residue B, and the Cβ atom of residue B. | 9 |
| C_value | 21 hydrophobicity contrast function values are obtained from distances around a zinc ion (ranging from 2 Å to 7 Å with 21 radii intervals). | 10 |
| Δσ_value | 21 mean atomic solvation parameter values are obtained from distances around a zinc ion (ranging from 2 Å to 7 Å with 21 radii intervals). | 11 |

**Supplementary Table 8.** Distribution of data sets for training and testing hybrid learning networks.

| Data type | Site type | CC | HH | CH | all |
| --- | --- | --- | --- | --- | --- |
| Train data | 1 | 87 | 2453 | 413 | 2905 |
| 0 | 76 | 1083 | 365 | 1572 |
| Test data | 1 | 47 | 1042 | 157 | 1246 |
| 0 | 32 | 460 | 182 | 674 |

1: Experimentally determined positive site; 0：Predicted negative site
